# Supplementary material
Source: publisher figshare collection journal article supplement (https://acs.figshare.com/ndownloader/files/22605566)
Supplement: Supplementary file 1 [file 22605566]

## Supporting Information

### **Innovative Electrochemical Strategy to Recovery of Cathode and Efficient Lithium Leaching from Spent Lithium-Ion Batteries**

Kui Liu,<sup>†</sup> Shenglong Yang,<sup>†</sup> Feiyan Lai,<sup>\*,‡</sup> Hongqiang Wang,<sup>†</sup> Youguo Huang,<sup>†</sup> Fenghua Zheng,<sup>†,§</sup> Shubin Wang,<sup>§</sup> Xiaohui Zhang,<sup>\*,†,‡</sup> and Qingyu Li<sup>†</sup>

<sup>†</sup> Guangxi Key Laboratory of Low Carbon Energy Materials, Guangxi New Energy Ship Battery Engineering Technology Research Center, School of Chemical and Pharmaceutical Science, Guangxi Normal University, Guilin 541004, China

<sup>‡</sup> College of Materials and Chemical Engineering, Hezhou University, Hezhou 542899, China

<sup>§</sup> School of Environmental Science and Engineering, Guangdong Provincial Key Laboratory of Soil and Groundwater Pollution Control, Southern University of Science and Technology, Guangzhou 518055, China.

#### **Corresponding author email addresses:**

zxhui017@163.com (X. Zhang) Tel: +86-0773-5856104;

fylai112@163.com (F. Lai) Tel: +86-0774-5271906.

## Tables

**Tab. S1** The leaching efficiency of metal using different cathodes in  $(\text{NH}_4)_2\text{SO}_4$  electrolyte.

| Cathodes | Leaching efficiency (%) |       |        |        |         | Time (min) |
|----------|-------------------------|-------|--------|--------|---------|------------|
|          | Li                      | Al    | Ni     | Co     | Mn      |            |
| Pt       | 98.13                   | 2.51  | 0.0026 | 0.0030 | 0.00060 | 4-5        |
| Al       | 91.82                   | 11.09 | 0.0026 | 0.0026 | 0.00061 | 18-20      |
| Cu       | 91.92                   | 4.49  | 0.0052 | 0.0059 | 0.00078 | 18-20      |
| Graphite | 85.86                   | 5.01  | 0.0039 | 0.0049 | 0.00064 | 28-30      |

**Tab. S2** The recovery rate of metal elements with the optimized condition

| Elements          | Li    | Al    | Ni    | Co    | Mn    |
|-------------------|-------|-------|-------|-------|-------|
| Recovery rate (%) | 98.28 | 97.48 | 99.56 | 99.24 | 98.75 |

## Figures

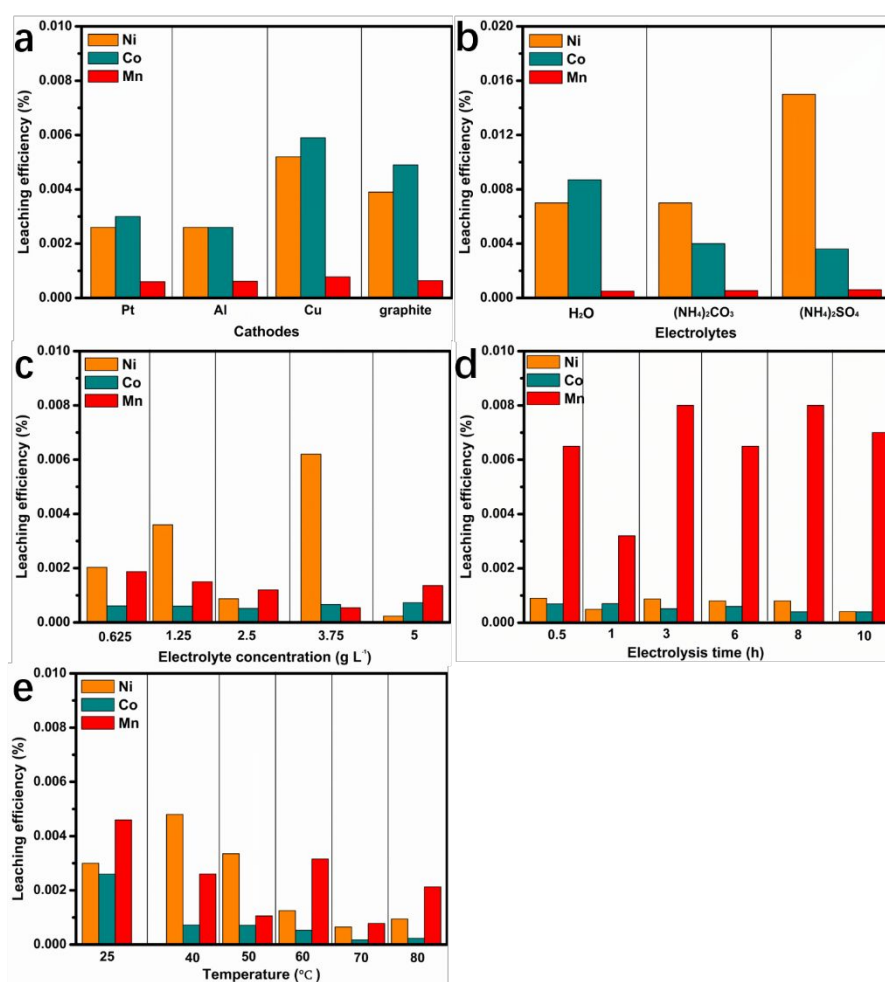

**Fig. S1** The leaching efficiency of Ni, Co and Mn elements in different conditions by electrolysis process.

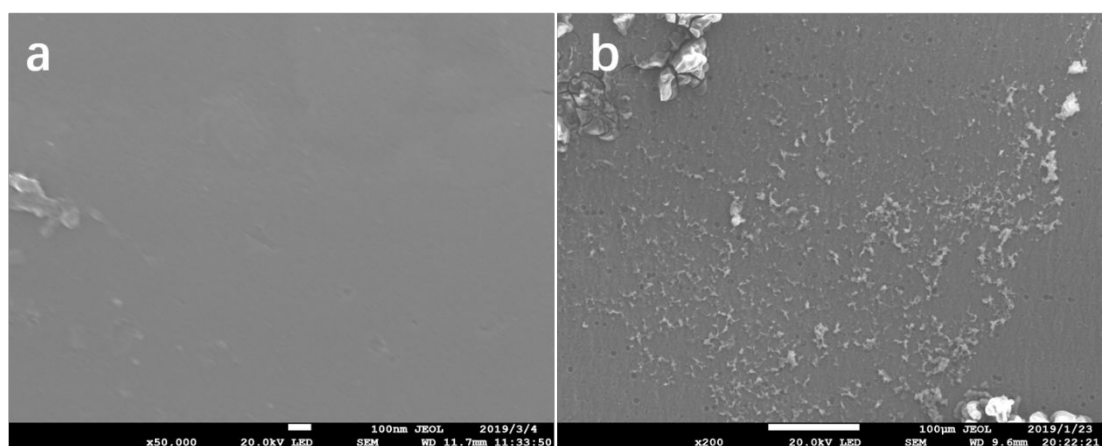

**Fig. S2** The surface appearance of the Al foils before (a) and after (b) electrolysis in  $(\text{NH}_4)_2\text{SO}_4$  solution.

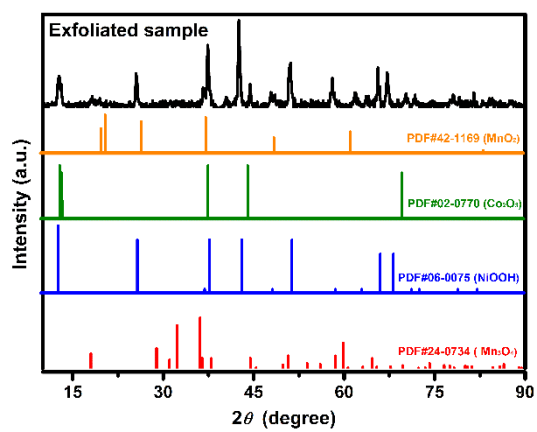

**Fig. S3** XRD patterns of the exfoliated cathode residue after electrolysis
